# Supplementary material for: Effects of community health worker interventions on socioeconomic inequities in maternal and newborn health in low-income and middle-income countries: a mixed-methods systematic review
Source: PubMed Central journal article supplement — BMJ Glob Health. 2019 Jun 16;4(3):e001308. doi: 10.1136/bmjgh-2018-001308 (PMC6577316; doi:10.1136/bmjgh-2018-001308), 2019-06-16
Supplement: bmjgh-2018-001308supp001.pdf [file bmjgh-2018-001308supp001.pdf]

**Supplementary Table 1: Search terms**

| Medline/<br>Ovid | Search Terms                                                                                                                                                                                                                                                                                                                                                                                                                                                                                                                                                                                                                                                 | Analogous concepts                                                                                                                                                                                                                                                                                                                                                                                                                                                                                                                                                                                                                                                   |
|------------------|--------------------------------------------------------------------------------------------------------------------------------------------------------------------------------------------------------------------------------------------------------------------------------------------------------------------------------------------------------------------------------------------------------------------------------------------------------------------------------------------------------------------------------------------------------------------------------------------------------------------------------------------------------------|----------------------------------------------------------------------------------------------------------------------------------------------------------------------------------------------------------------------------------------------------------------------------------------------------------------------------------------------------------------------------------------------------------------------------------------------------------------------------------------------------------------------------------------------------------------------------------------------------------------------------------------------------------------------|
| Equity component | <ul style="list-style-type: none"> <li>• exp Socioeconomic Factors/</li> <li>• exp health status disparities/</li> <li>• (( (social* or economic*) adj3 (status or stratum or strata or level* or position* or class* or factor*)) or (socioeconomic* or income* or gender or religion or caste* or "scheduled caste*" or "scheduled tribe*" or dalit* or adivasi* or wealth or poor or "non-poor" or poverty or impoveri* or literacy or marginali* or exclusion* or exclud* or vulnerab* or inequ* or disparit* or distribut* or equal* or equit*) or (education* adj3 (level* or status)) or (employ* adj3 (status or stratum or strata))).af.</li> </ul> | <ul style="list-style-type: none"> <li>• "exp Socioeconomic factors"<br/>MeSH term covers other sub-terms: poverty, social class, career mobility, educational status, employment, family characteristics, income, medical indigency, occupations, social change, social conditions</li> <li>• Health status disparities<br/>MeSH term</li> <li>• Social or economic status etc., Income, wealth, caste, gender, religion, poor, non-poor, poverty, impoverished, literacy, read, write, marginalized, exclusion, excluded, vulnerable, inequity/inequality, disparity, distribution, equality, equity, educational level/status, employment level/status</li> </ul> |

|                      |                                                                                                                                                                                                                                                                                                                                                                                                                                                                                                                                                                                                                                                                                                                                                                                                                                                                                                                                                                                                                                                                                                             |                                                                                                                                                                                                                                                                                                                                                                                                                                                                                                                                                                                                                                                                                                                                                                                                                                                                           |
|----------------------|-------------------------------------------------------------------------------------------------------------------------------------------------------------------------------------------------------------------------------------------------------------------------------------------------------------------------------------------------------------------------------------------------------------------------------------------------------------------------------------------------------------------------------------------------------------------------------------------------------------------------------------------------------------------------------------------------------------------------------------------------------------------------------------------------------------------------------------------------------------------------------------------------------------------------------------------------------------------------------------------------------------------------------------------------------------------------------------------------------------|---------------------------------------------------------------------------------------------------------------------------------------------------------------------------------------------------------------------------------------------------------------------------------------------------------------------------------------------------------------------------------------------------------------------------------------------------------------------------------------------------------------------------------------------------------------------------------------------------------------------------------------------------------------------------------------------------------------------------------------------------------------------------------------------------------------------------------------------------------------------------|
| <p>MNH component</p> | <ul style="list-style-type: none"> <li>• Prenatal Injuries/ or exp Prenatal Care/</li> <li>• exp Tetanus Toxoid/ad, cl, df, sd, tu [Administration &amp; Dosage, Classification, Deficiency, Supply &amp; Distribution, Therapeutic Use]</li> <li>• Birth Intervals/ or "birth spacing" or "contraception" or "family planning"</li> <li>• pregnancy/ or gravidity/ or exp labor, obstetric/ or pregnancy, high-risk/ or exp pregnancy outcome/</li> <li>• exp Pregnancy Complications/</li> <li>• Home Childbirth/ or Midwifery/</li> <li>• exp Delivery, Obstetric/ae, cl, co, mt, mo, st, sn, sd, td, ut [Adverse Effects, Classification, Complications, Methods, Mortality, Standards, Statistics &amp; Numerical Data, Supply &amp; Distribution, Trends, Utilization]</li> <li>• exp Infant, Low Birth Weight/ or exp Infant, Very Low Birth Weight/ or exp Infant, Extremely Low Birth Weight/ or exp Infant/ or exp Infant, Postmature/ or exp Infant, Premature/ or exp Sudden Infant Death/ or exp Infant, Newborn/ or exp Infant Food/ or exp Infant Mortality/ or exp Infant, Small</li> </ul> | <p><u>Behavioural outcomes:</u></p> <ul style="list-style-type: none"> <li>• Antenatal/prenatal care: home visits, check-ups (blood pressure, hemoglobin measures), TT injections, IFA tablets, maternal nutrition, birth planning</li> <li>• Delivery care: home/hospital delivery, traditional birth attendant, midwife, obstetric delivery (cesarean section, episiotomy, obstetrical extraction, labour induced, vaginal birth after cesarean, fetal version), delivery site</li> <li>• Postnatal care: postpartum period, lactation, complementary feeding etc. or exclusive breastfeeding, infant food (includes infant formula), kangaroo mother care, cord care, maternal nutrition, "infant and young child feeding"</li> </ul> <p><u>Health outcomes:</u></p> <ul style="list-style-type: none"> <li>• Prenatal: pregnancy or gravidity or high risk</li> </ul> |
|----------------------|-------------------------------------------------------------------------------------------------------------------------------------------------------------------------------------------------------------------------------------------------------------------------------------------------------------------------------------------------------------------------------------------------------------------------------------------------------------------------------------------------------------------------------------------------------------------------------------------------------------------------------------------------------------------------------------------------------------------------------------------------------------------------------------------------------------------------------------------------------------------------------------------------------------------------------------------------------------------------------------------------------------------------------------------------------------------------------------------------------------|---------------------------------------------------------------------------------------------------------------------------------------------------------------------------------------------------------------------------------------------------------------------------------------------------------------------------------------------------------------------------------------------------------------------------------------------------------------------------------------------------------------------------------------------------------------------------------------------------------------------------------------------------------------------------------------------------------------------------------------------------------------------------------------------------------------------------------------------------------------------------|

|  |                                                                                                                                                                                                                                                                                                                                                                                                                                                                                                                                                                                                                                                                                                                                                                                                                                                                                                                                                                                                      |                                                                                                                                                                                                                                                                                                                                                                                                                                                                                   |
|--|------------------------------------------------------------------------------------------------------------------------------------------------------------------------------------------------------------------------------------------------------------------------------------------------------------------------------------------------------------------------------------------------------------------------------------------------------------------------------------------------------------------------------------------------------------------------------------------------------------------------------------------------------------------------------------------------------------------------------------------------------------------------------------------------------------------------------------------------------------------------------------------------------------------------------------------------------------------------------------------------------|-----------------------------------------------------------------------------------------------------------------------------------------------------------------------------------------------------------------------------------------------------------------------------------------------------------------------------------------------------------------------------------------------------------------------------------------------------------------------------------|
|  | <p>for Gestational Age/ or exp Infant, Newborn, Diseases/ or exp Infant, Extremely Premature/ or exp Infant Care/ or exp Infant, Premature, Diseases/ or exp Infant Formula/ or exp Infant Death/</p> <ul style="list-style-type: none"> <li>• exp Fetal Death/ or exp Fetal Diseases/ or exp Fetal Mortality/</li> <li>• exp Perinatal Death/ or exp Perinatal Care/ or exp Perinatal Mortality/</li> <li>• exp Postnatal Care/</li> <li>• Exp postpartum period/</li> <li>• Exp Kangaroo-Mother Care Method/</li> <li>• exp Breast Feeding/ or exp Bottle Feeding/ or exp Infant Nutritional Physiological Phenomena/ or exp Infant Food/</li> <li>• exp Maternal Mortality/ or exp Maternal Death/</li> <li>• Child Mortality/</li> <li>• "folic acid" or "IFA tablet*" or "caesarean section*" or "traditional birth attendant*" or "birth cent*" or "kangaroo mother care" or "home deliver*" or "hospital deliver*" or "delivery site*" or "pregnancy complication*" or "cord care"</li> </ul> | <p>pregnancy, or pregnancy outcome, pregnancy complications (many included), prenatal mortality, fetal mortality</p> <ul style="list-style-type: none"> <li>• Delivery: delivery complications, obstetric (and premature) delivery, birth asphyxia, prolonged labour,</li> <li>• Perinatal/postnatal: infant, newborn, low birth weight, postmature, premature, perinatal mortality, neonatal or child mortality, pregnancy complications, maternal death or mortality</li> </ul> |
|--|------------------------------------------------------------------------------------------------------------------------------------------------------------------------------------------------------------------------------------------------------------------------------------------------------------------------------------------------------------------------------------------------------------------------------------------------------------------------------------------------------------------------------------------------------------------------------------------------------------------------------------------------------------------------------------------------------------------------------------------------------------------------------------------------------------------------------------------------------------------------------------------------------------------------------------------------------------------------------------------------------|-----------------------------------------------------------------------------------------------------------------------------------------------------------------------------------------------------------------------------------------------------------------------------------------------------------------------------------------------------------------------------------------------------------------------------------------------------------------------------------|

|                            |                                                                                                                                                                                                                                                                                                                                                                                                                                                                           |                                                                                                                                                                                                                                                                                                                         |
|----------------------------|---------------------------------------------------------------------------------------------------------------------------------------------------------------------------------------------------------------------------------------------------------------------------------------------------------------------------------------------------------------------------------------------------------------------------------------------------------------------------|-------------------------------------------------------------------------------------------------------------------------------------------------------------------------------------------------------------------------------------------------------------------------------------------------------------------------|
|                            | <ul style="list-style-type: none"> <li>• (Delivery adj3 (“Primary health cent**” or “community health cent**”))</li> <li>• “breast feed**” adj3 (exclusive OR “early initiation”)</li> <li>• ((prenatal or antenatal or prenatal or perinatal or postnatal or postpartum) adj3 (“home visit**” or care or health or nutrition or “check up**”)) or (maternal adj3 (health or care or care pattern* or “home visit” or nutrition))).af.</li> </ul>                         |                                                                                                                                                                                                                                                                                                                         |
| CHW intervention component | <ul style="list-style-type: none"> <li>• Community Health Workers/</li> <li>• ("lay health worker*" or "volunteer health worker*" or "Accredited Social Health Activist*" or "community health aide*" or "auxiliary nurse midwives" or "angan*wadi*" or “community nurse midwives” or “community health volunteer**” or "self help group*" or "community group*" or "women's group*" or "support group*" or "peer educator*" or "community?based agent**").af.</li> </ul> | <ul style="list-style-type: none"> <li>• Community health worker, lay health worker, volunteer, ASHA, community health aide, ANM, anganawadi, community nurse midwives or community health volunteers</li> <li>• Support or self-help or women’s groups</li> <li>• Peer educators and community-based agents</li> </ul> |
| Region component           | <ul style="list-style-type: none"> <li>• exp Asia/</li> <li>• exp Africa/</li> <li>• exp South America/</li> <li>• exp Central America/</li> <li>• Developing Countries/cl, sn</li> </ul>                                                                                                                                                                                                                                                                                 | <ul style="list-style-type: none"> <li>• MeSH terms for each continent cover all indexed countries included in them</li> <li>• MeSH term for developing countries includes all indexed</li> </ul>                                                                                                                       |

|                         |                                                                                                                                                                                                                                                                                                                                                                                                                                                                                                                                                                                                                                                                                                            |                                                                                                                                                                                                                                                                                                                                                                                                                                                                                                                                 |
|-------------------------|------------------------------------------------------------------------------------------------------------------------------------------------------------------------------------------------------------------------------------------------------------------------------------------------------------------------------------------------------------------------------------------------------------------------------------------------------------------------------------------------------------------------------------------------------------------------------------------------------------------------------------------------------------------------------------------------------------|---------------------------------------------------------------------------------------------------------------------------------------------------------------------------------------------------------------------------------------------------------------------------------------------------------------------------------------------------------------------------------------------------------------------------------------------------------------------------------------------------------------------------------|
|                         | <p>[Classification, Statistics &amp; Numerical Data]</p> <ul style="list-style-type: none"> <li>• (asia or india or "south asia" or africa or "south america" or "developing countr*" or "low income countr*" or "middle income countr*").af.</li> </ul>                                                                                                                                                                                                                                                                                                                                                                                                                                                   | <p>countries</p> <ul style="list-style-type: none"> <li>• Asia, India, South Asia, Africa, South America, Developing countries, low-income countries or middle income countries as all field search terms</li> </ul>                                                                                                                                                                                                                                                                                                            |
| <b>Embase/<br/>Ovid</b> | <b>Search Terms</b>                                                                                                                                                                                                                                                                                                                                                                                                                                                                                                                                                                                                                                                                                        | <b>Analogous concepts</b>                                                                                                                                                                                                                                                                                                                                                                                                                                                                                                       |
| Equity component        | <ul style="list-style-type: none"> <li>• exp socioeconomics/ or exp educational status/ or exp lowest income group/ or exp poverty/</li> <li>• Income/</li> <li>• employment/ or employment status/</li> <li>• exp health disparity/</li> <li>• (((social* or economic*) adj3 (status or stratum or strata or level* or position* or class* or factor*)) or (income* or gender or religion or caste* or "scheduled caste*" or "scheduled tribe*" or dalit* or adavasi* or wealth or poor or "non-poor" or poverty or impoveri* or literacy or read* or writ* or marginali* or exclusion* or exclud* or vulnerab* or inequ* or disparit* or distribut* or equal* or equit*) or ((education* adj3</li> </ul> | <ul style="list-style-type: none"> <li>• "exp socioeconomic" MeSH term covers other sub-terms: poverty, lowest income group, economic aspect, socioeconomic aspect, socioeconomic factor</li> <li>• educational status, employment, income MeSH terms</li> <li>• (exp health disparity) MeSH term includes: health disparities, health status disparities, health status disparity</li> <li>• Social or economic status, position, strata, stratum, level, position, class, factor</li> <li>• Income, wealth, caste,</li> </ul> |

|                      |                                                                                                                                                                                                                                                                                                                                                                                                                                                                                                                                                                                                                                                                                                        |                                                                                                                                                                                                                                                                                                                                                                                                                                                                                                                                                                            |
|----------------------|--------------------------------------------------------------------------------------------------------------------------------------------------------------------------------------------------------------------------------------------------------------------------------------------------------------------------------------------------------------------------------------------------------------------------------------------------------------------------------------------------------------------------------------------------------------------------------------------------------------------------------------------------------------------------------------------------------|----------------------------------------------------------------------------------------------------------------------------------------------------------------------------------------------------------------------------------------------------------------------------------------------------------------------------------------------------------------------------------------------------------------------------------------------------------------------------------------------------------------------------------------------------------------------------|
|                      | <p>(level* or status)) or (employ* adj3 (status or stratum or strata))).af.</p>                                                                                                                                                                                                                                                                                                                                                                                                                                                                                                                                                                                                                        | <p>gender, religion, poor, non-poor, poverty, impoverished, literacy, read, write, marginalized, exclusion, excluded, vulnerable, inequity/inequality, disparity, distribution, equality, equity, educational level/status, employment level/status</p>                                                                                                                                                                                                                                                                                                                    |
| <p>MNH component</p> | <ul style="list-style-type: none"> <li>• prenatal injury/ or exp prenatal care/ or exp prenatal mortality/ or exp prenatal period/</li> <li>• tetanus toxoid/ ad, po [Drug Administration, Oral Drug Administration]</li> <li>• folic acid/ad, po [Drug Administration, Oral Drug Administration]</li> <li>• exp family planning/ or "birth spacing" or "birth intervals" or "contraception"</li> <li>• exp instrumental delivery/</li> <li>• exp midwife/ or exp nurse midwife/ or exp traditional birth attendant/</li> <li>• exp delivery/ or exp home delivery/ or exp instrumental delivery/ or exp labor induction/ or exp vaginal delivery/</li> <li>• exp pregnancy outcome/ or exp</li> </ul> | <p><u>Behavioural outcomes:</u></p> <ul style="list-style-type: none"> <li>• Antenatal/prenatal care: home visits, check-ups (blood pressure, hemoglobin measures), TT injections, IFA tablets, maternal nutrition, birth planning</li> <li>• Delivery care: home/hospital delivery, traditional birth attendant, midwife, instrumental delivery (covers: operative delivery, surgical delivery, delivery, obstetric operation, cesarean section, breech extraction, forceps delivery, vacuum extraction), delivery at PHCs or CHCs, perinatal period and care.</li> </ul> |

|  |                                                                                                                                                                                                                                                                                                                                                                                                                                                                                                                                                                                                                                                                                                                                                                                                                                                                                                                                                                                                                   |                                                                                                                                                                                                                                                                                                                                                                                                                                                                                                                                                                                                                                                                                                                                                                               |
|--|-------------------------------------------------------------------------------------------------------------------------------------------------------------------------------------------------------------------------------------------------------------------------------------------------------------------------------------------------------------------------------------------------------------------------------------------------------------------------------------------------------------------------------------------------------------------------------------------------------------------------------------------------------------------------------------------------------------------------------------------------------------------------------------------------------------------------------------------------------------------------------------------------------------------------------------------------------------------------------------------------------------------|-------------------------------------------------------------------------------------------------------------------------------------------------------------------------------------------------------------------------------------------------------------------------------------------------------------------------------------------------------------------------------------------------------------------------------------------------------------------------------------------------------------------------------------------------------------------------------------------------------------------------------------------------------------------------------------------------------------------------------------------------------------------------------|
|  | <p>pregnancy complication/ or exp pregnancy/ or exp labor complication/</p> <ul style="list-style-type: none"> <li>• exp lactation/</li> <li>• exp breast feeding/</li> <li>• exp infant feeding/ or exp infant nutrition/ or exp bottle feeding/ or exp breast feeding/ or exp baby food</li> <li>• newborn mortality/ or fetus mortality/ or perinatal mortality/ or premature mortality/ or infant mortality/ or prenatal mortality</li> <li>• exp stillbirth</li> <li>• exp perinatal infection/ or exp perinatal morbidity/ or exp perinatal period/ or exp perinatal care/</li> <li>• exp prematurity/ or exp "immature and premature labor"/ or exp newborn disease/</li> <li>• exp low birth weight/ or exp birth weight/ or exp extremely low birth weight/ or exp small for date infant/ or exp very low birth weight/</li> <li>• exp maternal disease/ or exp maternal mortality/ or exp maternal morbidity/ or exp maternal nutrition/ or exp maternal care/</li> <li>• exp kangaroo care/</li> </ul> | <ul style="list-style-type: none"> <li>• Postnatal care: postpartum period, lactation, (exclusive or early initiation) breastfeeding, kangaroo mother care, infant food, feeding or nutrition, complementary feeding, cord care, maternal nutrition</li> </ul> <p><u>Health outcomes:</u></p> <ul style="list-style-type: none"> <li>• Prenatal: pregnancy or pregnancy outcome, or pregnancy complications (many included), prenatal mortality, fetal mortality</li> <li>• Delivery: pregnancy or labor complications</li> <li>• Perinatal/postnatal: infant, newborn, low birth weight, "premature and immature labour", perinatal infection, morbidity or mortality, neonatal or childhood mortality</li> <li>• Maternal death, disease, morbidity or mortality</li> </ul> |
|--|-------------------------------------------------------------------------------------------------------------------------------------------------------------------------------------------------------------------------------------------------------------------------------------------------------------------------------------------------------------------------------------------------------------------------------------------------------------------------------------------------------------------------------------------------------------------------------------------------------------------------------------------------------------------------------------------------------------------------------------------------------------------------------------------------------------------------------------------------------------------------------------------------------------------------------------------------------------------------------------------------------------------|-------------------------------------------------------------------------------------------------------------------------------------------------------------------------------------------------------------------------------------------------------------------------------------------------------------------------------------------------------------------------------------------------------------------------------------------------------------------------------------------------------------------------------------------------------------------------------------------------------------------------------------------------------------------------------------------------------------------------------------------------------------------------------|

|                                           |                                                                                                                                                                                                                                                                                                                                                                                                                                                                                                                                                                                                                                                                                                                   |                                                                                                                                                                                                                                                                                                  |
|-------------------------------------------|-------------------------------------------------------------------------------------------------------------------------------------------------------------------------------------------------------------------------------------------------------------------------------------------------------------------------------------------------------------------------------------------------------------------------------------------------------------------------------------------------------------------------------------------------------------------------------------------------------------------------------------------------------------------------------------------------------------------|--------------------------------------------------------------------------------------------------------------------------------------------------------------------------------------------------------------------------------------------------------------------------------------------------|
|                                           | <ul style="list-style-type: none"> <li>• exp postnatal care/</li> <li>• exp child health/</li> <li>• ("IFA tablet*" or "TT injection*" or "caesarean section*" or "traditional birth attendant*" or "birth cent*" or "kangaroo mother care" or "hospital delivery" or "home delivery" or "cord care")</li> <li>• (Delivery adj3 ("Primary health cent*" or "community health cent*"))</li> <li>• "breast feed*" adj3 (exclusive OR "early initiation")</li> <li>• ((prenatal or antenatal or perinatal or postnatal or postpartum) adj3 (care or "home visit*" or health or nutrition or death or "check up*")) a.f.</li> <li>• ((maternal) adj3 (health or care or "care pattern*" or nutrition))a.f.</li> </ul> |                                                                                                                                                                                                                                                                                                  |
| <p>CHW<br/>intervention<br/>component</p> | <ul style="list-style-type: none"> <li>• exp health auxiliary/</li> <li>• ("lay health worker*" or "volunteer health worker*" or "Accredited Social Health Activist*" or "community health aide*" or "auxiliary nurse midwives" or "angan*wadi*" or "community health worker*" or "community nurse midwives" or "community health volunteer*" or "self help group*" or</li> </ul>                                                                                                                                                                                                                                                                                                                                 | <ul style="list-style-type: none"> <li>• Auxiliary health worker, lay health worker, volunteer, ASHA, community health aide, ANM, anganawadi, community nurse midwives or community health volunteers</li> <li>• Support or self-help or women's groups</li> <li>• Peer educators and</li> </ul> |



|                       |                                                                                                                                                                                                                                                                                                                                                        |                                                                                                                                                                                                                                                                                                                                                                        |
|-----------------------|--------------------------------------------------------------------------------------------------------------------------------------------------------------------------------------------------------------------------------------------------------------------------------------------------------------------------------------------------------|------------------------------------------------------------------------------------------------------------------------------------------------------------------------------------------------------------------------------------------------------------------------------------------------------------------------------------------------------------------------|
|                       | "community group*" or "women's group*" or "support group*" or "peer educator*" or "community?based agent*")                                                                                                                                                                                                                                            | community-based agents                                                                                                                                                                                                                                                                                                                                                 |
| Region component      | <ul style="list-style-type: none"> <li>• exp Asia/</li> <li>• exp Africa/</li> <li>• exp South America/</li> <li>• exp Central America</li> <li>• exp developing country/</li> <li>• (asia or india or africa or "central America" or "south america" or "developing countr*" or "low income countr*" or "middle income countr*")</li> </ul>           | <ul style="list-style-type: none"> <li>• MeSH terms for each continent cover all indexed countries included in them</li> <li>• MeSH term for developing countries includes all indexed countries</li> <li>• Asia, India, South Asia, Africa, South America, Developing countries, low-income countries or middle income countries as all field search terms</li> </ul> |
| <b>Web of Science</b> | <b>Search Terms</b>                                                                                                                                                                                                                                                                                                                                    | <b>Analogous concepts</b>                                                                                                                                                                                                                                                                                                                                              |
| Equity component      | <ul style="list-style-type: none"> <li>• TS=((*social* OR economic* OR education* OR *employ*) NEAR/3 (status OR stratum OR strata OR level* OR position* OR class* OR factor*))</li> <li>• TS = (("socioeconomic factors" or "socioeconomic status" or "health status disparit*" or "health disparit*" socioeconomic* or income* or gender</li> </ul> | <ul style="list-style-type: none"> <li>• Social/economic/education/e employment near status/stratum/strata/level/position/class/factor</li> <li>• poverty, educational status, employment</li> <li>• socioeconomic factors/status, or health status disparities</li> <li>• Income, wealth, caste,</li> </ul>                                                           |

|                      |                                                                                                                                                                                                                                                                                                                                                                                                                                                                                                                                                                                                                                                                                              |                                                                                                                                                                                                                                                                                                                                                                                                                                                                                                                                                                                                                 |
|----------------------|----------------------------------------------------------------------------------------------------------------------------------------------------------------------------------------------------------------------------------------------------------------------------------------------------------------------------------------------------------------------------------------------------------------------------------------------------------------------------------------------------------------------------------------------------------------------------------------------------------------------------------------------------------------------------------------------|-----------------------------------------------------------------------------------------------------------------------------------------------------------------------------------------------------------------------------------------------------------------------------------------------------------------------------------------------------------------------------------------------------------------------------------------------------------------------------------------------------------------------------------------------------------------------------------------------------------------|
|                      | <p>or religion or caste* or "scheduled caste*" or "scheduled tribe*" or dalit* or adavasi* or wealth or poor or "non-poor" or poverty or impoveri* or literacy or read* or writ* or marginali* or exclusion* or exclud* or vulnerab* or inequ* or disparit* or distribut* or equal* or equit*))</p>                                                                                                                                                                                                                                                                                                                                                                                          | <p>gender, religion, poor, non-poor, poverty, impoverished, literacy, read, write, marginalized, exclusion, excluded, vulnerable, inequity/inequality, disparity, distribution, equality, equity</p>                                                                                                                                                                                                                                                                                                                                                                                                            |
| <p>MNH component</p> | <ul style="list-style-type: none"> <li>• TS= ("home visit*" OR "tetanus toxoid" OR "iron folic acid" OR "birth plan*" OR "birth spac*" or contraception or "kangaroo mother care" OR "skin to skin contact" OR stillbirth* OR "live birth*" OR "cesarean section*" OR "traditional birth attendant*" OR midwife OR "obstetric deliver*" OR "induced labour" OR "vaginal birth*" OR "delivery site" OR "home deliver*" OR "hospital deliver*")</li> <li>• TS= (pregnancy or gravidity or "high risk pregnancy" or "pregnancy outcome" or "pregnancy complication*" OR asphyxia OR preeclampsia OR eclampsia OR "obstructed labour*" OR "prolonged labour" or "breech" or "delivery</li> </ul> | <p><u>Behavioural outcomes:</u></p> <ul style="list-style-type: none"> <li>• Antenatal/prenatal care: home visits, check-ups (blood pressure, hemoglobin measures), TT injections, IFA tablets, maternal nutrition, birth planning and contraception</li> <li>• Delivery care – home/hospital delivery, traditional birth attendant, midwife, obstetric delivery (cesarean section, episiotomy, induced labour, vaginal birth), delivery site</li> <li>• Postnatal care: postpartum period, lactation, complementary feeding etc. or exclusive breastfeeding, infant food (includes infant formula),</li> </ul> |

|                                   |                                                                                                                                                                                                                                                                                                                                                                                                                                                                                                                                                                                                                                                                                                          |                                                                                                                                                                                                                                                                                                                                                                                                                                                                                                                                                                                                                                                            |
|-----------------------------------|----------------------------------------------------------------------------------------------------------------------------------------------------------------------------------------------------------------------------------------------------------------------------------------------------------------------------------------------------------------------------------------------------------------------------------------------------------------------------------------------------------------------------------------------------------------------------------------------------------------------------------------------------------------------------------------------------------|------------------------------------------------------------------------------------------------------------------------------------------------------------------------------------------------------------------------------------------------------------------------------------------------------------------------------------------------------------------------------------------------------------------------------------------------------------------------------------------------------------------------------------------------------------------------------------------------------------------------------------------------------------|
|                                   | <p>complication*" or "low birth weight" OR postpartum period" or "lactation" or "complementary feeding" or "exclusive breastfeeding" or "breastfeeding" or "early initiation of breastfeeding" or "infant food" or "infant formula" or "cord care" or "young child feeding")</p> <ul style="list-style-type: none"> <li>• TS = ((complication* OR preterm OR premature OR "high risk") NEAR/3 (deliv* OR birth OR pregnan* OR labo\$r* OR deliver*))</li> <li>• TS = ((fetal OR antenatal OR perinatal OR prenatal OR infant OR neonatal OR newborn OR postnatal OR postpartum OR maternal) NEAR/3 (care OR or health OR nutrition OR mortal* OR death OR morbidity OR disease* OR illness*))</li> </ul> | <p>kangaroo mother care, cord care, maternal nutrition, "infant and young child feeding"</p> <p><u>Health outcomes:</u></p> <ul style="list-style-type: none"> <li>• Prenatal: pregnancy or gravidity or high risk pregnancy, or pregnancy outcome, pregnancy complications (many included), prenatal mortality, fetal mortality</li> <li>• Delivery: delivery complications, obstetric (and premature) delivery, birth asphyxia, prolonged labour, breech</li> <li>• Perinatal/postnatal: infant, newborn, low birth weight, premature, perinatal mortality, neonatal or child mortality, pregnancy complications, maternal death or mortality</li> </ul> |
| <p>CHW intervention component</p> | <ul style="list-style-type: none"> <li>• TS= ("lay health worker*" OR "volunteer health worker*" OR "Accredited Social Health Activist*" OR "community health aide*" OR</li> </ul>                                                                                                                                                                                                                                                                                                                                                                                                                                                                                                                       | <ul style="list-style-type: none"> <li>• Community health worker, lay health worker, volunteer, ASHA, community health aide, ANM, anganwadi,</li> </ul>                                                                                                                                                                                                                                                                                                                                                                                                                                                                                                    |

|                  |                                                                                                                                                                                                                                                                                                                                                         |                                                                                                                                                                                                                                                                                  |
|------------------|---------------------------------------------------------------------------------------------------------------------------------------------------------------------------------------------------------------------------------------------------------------------------------------------------------------------------------------------------------|----------------------------------------------------------------------------------------------------------------------------------------------------------------------------------------------------------------------------------------------------------------------------------|
|                  | <p>"auxiliary nurse midwives" OR "angan*wadi*" OR "community health worker*" or "community health volunteer*")</p> <ul style="list-style-type: none"> <li>• TS= ("self help group*" or "community group*" or "women's group*" or "support group*" or "peer educator*" or "community?based agent*")</li> </ul>                                           | <p>community nurse midwives or community health volunteers</p> <ul style="list-style-type: none"> <li>• Support or self-help or women's groups</li> <li>• Peer educators and community-based agents</li> </ul>                                                                   |
| Region component | <ul style="list-style-type: none"> <li>• TS = (asia OR "south asia" or india OR africa OR "south America" OR "central America" or "developing countr*" OR "low income countr*" OR "middle income countr*")</li> </ul>                                                                                                                                   | <ul style="list-style-type: none"> <li>• Comparable continents and countries of interest included - Asia, India, South Asia, Africa, South America, Developing countries, low-income countries or middle income countries as all field search terms</li> </ul>                   |
| <b>Scopus</b>    | <b>Search Terms</b>                                                                                                                                                                                                                                                                                                                                     | <b>Analogous concepts</b>                                                                                                                                                                                                                                                        |
| Equity component | <ul style="list-style-type: none"> <li>• TITLE-ABS-KEY((*social* OR econ omic* OR education* OR *employ*) W/3 (status OR stratum OR strata OR level* OR position* OR class* OR factor*))</li> <li>• TITLE-ABS-KEY ("socioeconomic factor*" or "socioeconomic status" OR "health status disparit*" or "health status distribution" or "health</li> </ul> | <ul style="list-style-type: none"> <li>• "exp Socioeconomic factors" covers other sub-terms: poverty, social class, career mobility, educational status, employment, family characteristics, income, medical indigency, occupations, social change, social conditions</li> </ul> |

|                      |                                                                                                                                                                                                                                                                                                                                                                                                                                                                                                                                                                                                                |                                                                                                                                                                                                                                                                                                                                                                                                                                                                                |
|----------------------|----------------------------------------------------------------------------------------------------------------------------------------------------------------------------------------------------------------------------------------------------------------------------------------------------------------------------------------------------------------------------------------------------------------------------------------------------------------------------------------------------------------------------------------------------------------------------------------------------------------|--------------------------------------------------------------------------------------------------------------------------------------------------------------------------------------------------------------------------------------------------------------------------------------------------------------------------------------------------------------------------------------------------------------------------------------------------------------------------------|
|                      | <p>disparit** or or income* or gender or religion or caste* or “scheduled caste**” or “scheduled tribe**” or dalit* or adavasi* or wealth or poor or "non-poor" or poverty or impoveri* or literacy or or marginali* or “social exclusion**” or vulnerab* or inequ* or disparit* or equal* or equit*)</p>                                                                                                                                                                                                                                                                                                      | <ul style="list-style-type: none"> <li>• Health status disparities</li> <li>• Social or economic status etc., Income, wealth, religion, caste, gender, poor, non-poor, poverty, impoverished, literacy, social exclusion, marginalized, health status disparities, vulnerable, inequity/inequality, disparity, equality, equity, educational level/status, employment level/status</li> </ul>                                                                                  |
| <p>MNH component</p> | <ul style="list-style-type: none"> <li>• TITLE-ABS-KEY (“home visit” or “tetanus toxoid” or “iron folic acid” or “birth plan**” or “birth spac**” or contraception OR stillbirth* OR "live birth**" OR “pregnancy” or “gravidity” or “high risk pregnancy” or “pregnancy outcome” or “pregnancy complication**” OR “delivery complication**” or “obstetric deliver**” or “vaginal birth**” or “delivery site” or “home deliver**” or “hospital deliver**” or "c\$esarean section**" OR “midwife” or "traditionalbirth attendant**" OR asphyxia OR preeclampsia OR eclampsia OR “induced labo\$r” OR</li> </ul> | <p><u>Behavioural outcomes:</u></p> <ul style="list-style-type: none"> <li>• Antenatal/prenatal care: home visits, check-ups (blood pressure, hemoglobin measures), TT injections, IFA tablets, maternal nutrition, birth planning and contraception</li> <li>• Delivery care: delivery site, home/hospital delivery, traditional birth attendant, midwife, obstetric delivery, cesarean section, episiotomy, obstetrical extraction, labour induced, vaginal birth</li> </ul> |

|  |                                                                                                                                                                                                                                                                                                                                                                                                                                                                                                                                                                                                                                                                                                                                                                                                                                                 |                                                                                                                                                                                                                                                                                                                                                                                                                                                                                                                                                                                                                                                                                                                                                                                                                                                  |
|--|-------------------------------------------------------------------------------------------------------------------------------------------------------------------------------------------------------------------------------------------------------------------------------------------------------------------------------------------------------------------------------------------------------------------------------------------------------------------------------------------------------------------------------------------------------------------------------------------------------------------------------------------------------------------------------------------------------------------------------------------------------------------------------------------------------------------------------------------------|--------------------------------------------------------------------------------------------------------------------------------------------------------------------------------------------------------------------------------------------------------------------------------------------------------------------------------------------------------------------------------------------------------------------------------------------------------------------------------------------------------------------------------------------------------------------------------------------------------------------------------------------------------------------------------------------------------------------------------------------------------------------------------------------------------------------------------------------------|
|  | <p>“obstructed labo\$r” OR “prolonged labo\$r” OR “vaginal birth” or “breech” OR breastfe* OR lactation or “delivery complication*” or “low birth weight” OR "kangaroo mother care" OR "skin to skin contact" “exclusive breastfeeding” or “complementary feeding” or “early initiation of breastfeeding” or “infant food” or “infant formula” or “cord care” or “young child feeding”)</p> <ul style="list-style-type: none"> <li>• TITLE-ABS-KEY ((complication* OR preterm OR premature OR "high risk") W/3 (deliv* OR birth OR pregnan* OR labo\$r* OR deliver*))</li> <li>• TITLE-ABS-KEY ((fetal OR prenatal or antenatal or perinatal OR neonatal or newborn or infant OR postnatal OR postpartum OR maternal) W/3 (care OR health OR nutrition OR mortal* OR morbidity OR death OR disease* OR illness* OR feeding OR food))</li> </ul> | <ul style="list-style-type: none"> <li>• Postnatal care: lactation, complementary feeding, early initiation or exclusive breastfeeding, infant/young child food or feeding, kangaroo mother care, cord care, infant and maternal nutrition, “infant and young child feeding”</li> </ul> <p><u>Health outcomes:</u></p> <ul style="list-style-type: none"> <li>• Prenatal: pregnancy or gravidity or high risk pregnancy, or pregnancy outcome, pregnancy complications, prenatal mortality, fetal mortality</li> <li>• Delivery: delivery complications, obstetric (and premature) delivery, birth asphyxia, prolonged labour, pre- or eclampsia</li> <li>• Perinatal/postnatal: infant, newborn, low birth weight, premature, perinatal mortality, neonatal or infant morbidity or mortality, maternal death, morbidity or mortality</li> </ul> |
|--|-------------------------------------------------------------------------------------------------------------------------------------------------------------------------------------------------------------------------------------------------------------------------------------------------------------------------------------------------------------------------------------------------------------------------------------------------------------------------------------------------------------------------------------------------------------------------------------------------------------------------------------------------------------------------------------------------------------------------------------------------------------------------------------------------------------------------------------------------|--------------------------------------------------------------------------------------------------------------------------------------------------------------------------------------------------------------------------------------------------------------------------------------------------------------------------------------------------------------------------------------------------------------------------------------------------------------------------------------------------------------------------------------------------------------------------------------------------------------------------------------------------------------------------------------------------------------------------------------------------------------------------------------------------------------------------------------------------|

|                                   |                                                                                                                                                                                                                                                                                                                                                                                                                                    |                                                                                                                                                                                                                                                                                                                         |
|-----------------------------------|------------------------------------------------------------------------------------------------------------------------------------------------------------------------------------------------------------------------------------------------------------------------------------------------------------------------------------------------------------------------------------------------------------------------------------|-------------------------------------------------------------------------------------------------------------------------------------------------------------------------------------------------------------------------------------------------------------------------------------------------------------------------|
| <p>CHW intervention component</p> | <ul style="list-style-type: none"> <li>• ALL ("lay health worker*" OR "volunteer health worker*" OR "Accredited Social Health Activist*" OR "community health aide*" OR "auxiliary nurse midwives" OR "angan*wadi*" OR "community health worker*" or "community health volunteer*" or "self help group*" or "community group*" or "women's group*" or "support group*" or "peer educator*" or "community?based agent*")</li> </ul> | <ul style="list-style-type: none"> <li>• Community health worker, lay health worker, volunteer, ASHA, community health aide, ANM, anganawadi, community nurse midwives or community health volunteers</li> <li>• Support or self-help or women's groups</li> <li>• Peer educators and community-based agents</li> </ul> |
| <p>Region component</p>           | <ul style="list-style-type: none"> <li>• TITLE-ABS-KEY (asia OR "south asia" or india OR africa OR "south America" OR "central America" or "developing countr*" OR "low income countr*" OR "middle income countr*")</li> </ul>                                                                                                                                                                                                     | <ul style="list-style-type: none"> <li>• Comparable continents and countries of interest included - Asia, India, South Asia, Africa, South America, Developing countries, low-income countries or middle income countries as all field search terms</li> </ul>                                                          |
