# Supplementary material for: Effects of community health worker interventions on socioeconomic inequities in maternal and newborn health in low-income and middle-income countries: a mixed-methods systematic review
Source: PubMed Central journal article supplement — BMJ Glob Health. 2019 Jun 16;4(3):e001308. doi: 10.1136/bmjgh-2018-001308 (PMC6577316; doi:10.1136/bmjgh-2018-001308), 2019-06-16
Supplement: bmjgh-2018-001308supp002.pdf [file bmjgh-2018-001308supp002.pdf]

**Supplementary Table 2: Inclusion and exclusion criteria**

|                                | <b>Inclusion criteria</b>                                                                                                                                                                                                                                                                                                                                                                                                                                                                                                                                     | <b>Exclusion criteria</b>                                                                                                                                                                                                                                                                                                                                                                          |
|--------------------------------|---------------------------------------------------------------------------------------------------------------------------------------------------------------------------------------------------------------------------------------------------------------------------------------------------------------------------------------------------------------------------------------------------------------------------------------------------------------------------------------------------------------------------------------------------------------|----------------------------------------------------------------------------------------------------------------------------------------------------------------------------------------------------------------------------------------------------------------------------------------------------------------------------------------------------------------------------------------------------|
| <i>Study focus</i>             | <ol style="list-style-type: none"> <li>1. Interventions involving CHWs working in the community to promote care-seeking and/or behaviour change for MNH</li> <li>2. Interventions training any lay, locally-based health workers within an MNH care-based initiative</li> <li>3. Interventions addressing pregnancy, perinatal (28 weeks gestation to 6 days after birth) and post-early newborn (7-28 days after birth) periods</li> <li>4. Studies that assessed associations of CHW activities with socio-economic distribution of MNH outcomes</li> </ol> | <ol style="list-style-type: none"> <li>1. Studies of health outcomes after 28 days postpartum, including <i>only</i> reproductive or other health issues in maternal or child populations like human papillomavirus, cervical cancer, human immunodeficiency virus, trauma, and malaria without relation to perinatal or neonatal outcomes</li> <li>2. No reference to CHWs of any kind</li> </ol> |
| <i>Study location</i>          | <ol style="list-style-type: none"> <li>5. Empirical research that was conducted at least in part or solely in a low-income or middle-income country</li> </ol>                                                                                                                                                                                                                                                                                                                                                                                                | <ol style="list-style-type: none"> <li>3. Data only from high income countries</li> </ol>                                                                                                                                                                                                                                                                                                          |
| <i>Study types and designs</i> | <ol style="list-style-type: none"> <li>6. Published in a peer-reviewed journal with primary data collection</li> <li>7. All study designs including:</li> </ol>                                                                                                                                                                                                                                                                                                                                                                                               | <ol style="list-style-type: none"> <li>4. Not in a peer-reviewed format</li> <li>5. Studies with CHWs as data collectors but not in the</li> </ol>                                                                                                                                                                                                                                                 |

|                              |                                                                                                                                                                                                            |                                                                                                                                                                                                                                                                                                                                |
|------------------------------|------------------------------------------------------------------------------------------------------------------------------------------------------------------------------------------------------------|--------------------------------------------------------------------------------------------------------------------------------------------------------------------------------------------------------------------------------------------------------------------------------------------------------------------------------|
|                              | <p>randomised controlled trials, case-control studies, cohort studies, observational or cross-sectional studies, non-randomized controlled trials, quasi-experimental studies, and qualitative studies</p> | <p>programme indicators being measured</p> <p>6. Studies without any description of context and strategies of the intervention studied, or insufficient detail on the protocol for data collection/ analysis of the study</p> <p>7. Reviews, systematic or not</p> <p>8. No abstract or full text available electronically</p> |
| <p><i>Study timeline</i></p> | <p>8. Studies conducted with data collected between 1990 and 2017</p> <p>9. Studies published between 1996 and 2017</p>                                                                                    | <p>9. Studies conducted before 1990 or published before 1996</p>                                                                                                                                                                                                                                                               |
