# Supplementary material for: Effects of community health worker interventions on socioeconomic inequities in maternal and newborn health in low-income and middle-income countries: a mixed-methods systematic review
Source: PubMed Central journal article supplement — BMJ Glob Health. 2019 Jun 16;4(3):e001308. doi: 10.1136/bmjgh-2018-001308 (PMC6577316; doi:10.1136/bmjgh-2018-001308), 2019-06-16
Supplement: bmjgh-2018-001308supp003.pdf [file bmjgh-2018-001308supp003.pdf]

**Supplementary Table 3:** Extraction sheet for NVivo nodes

| Parent nodes                                                                             | Child nodes                                                                                                                                                                                                                                                                                                           |
|------------------------------------------------------------------------------------------|-----------------------------------------------------------------------------------------------------------------------------------------------------------------------------------------------------------------------------------------------------------------------------------------------------------------------|
| <ul style="list-style-type: none"> <li>• Study population and drop-outs</li> </ul>       |                                                                                                                                                                                                                                                                                                                       |
| <ul style="list-style-type: none"> <li>• Study design, data sources, sampling</li> </ul> |                                                                                                                                                                                                                                                                                                                       |
| <ul style="list-style-type: none"> <li>• Purpose or hypotheses</li> </ul>                |                                                                                                                                                                                                                                                                                                                       |
| <ul style="list-style-type: none"> <li>• Intervention description</li> </ul>             | <ul style="list-style-type: none"> <li>○ Targeting or universal</li> <li>○ Strategies or processes</li> <li>○ Channels of implementation</li> </ul>                                                                                                                                                                   |
| <ul style="list-style-type: none"> <li>• Methods and analysis</li> </ul>                 | <ul style="list-style-type: none"> <li>○ Timeline</li> <li>○ Social position/ equity measures</li> <li>○ Primary outcomes               <ul style="list-style-type: none"> <li>▪ Coverage</li> <li>▪ Behavioural outcomes</li> <li>▪ Health outcomes</li> </ul> </li> <li>○ Contextual/moderator variables</li> </ul> |
| <p>Results</p>                                                                           | <ul style="list-style-type: none"> <li>○ Equity findings               <ul style="list-style-type: none"> <li>▪ Relative differences</li> <li>▪ Absolute differences</li> <li>▪ Stratified findings</li> </ul> </li> </ul>                                                                                            |
| <ul style="list-style-type: none"> <li>• Quality appraisal</li> </ul>                    | <ul style="list-style-type: none"> <li>○ Trustworthiness and transferability – appropriate methods and sampling, analysis, results with quotes, assumptions and</li> </ul>                                                                                                                                            |

|                                                                                      |                                                                                                                                                                                                                                                                                           |
|--------------------------------------------------------------------------------------|-------------------------------------------------------------------------------------------------------------------------------------------------------------------------------------------------------------------------------------------------------------------------------------------|
|                                                                                      | <p>positionality</p> <ul style="list-style-type: none"> <li>○ Internal validity – sampling, measurement, analysis, confounding, fit-for-purpose</li> <li>○ External validity – interactions/selection biases, sample size/ power/ comparisons, results and context description</li> </ul> |
| <ul style="list-style-type: none"> <li>• Description of context</li> </ul>           |                                                                                                                                                                                                                                                                                           |
| <ul style="list-style-type: none"> <li>• Important quotes and conclusions</li> </ul> |                                                                                                                                                                                                                                                                                           |
