# Supplementary material for: Effects of community health worker interventions on socioeconomic inequities in maternal and newborn health in low-income and middle-income countries: a mixed-methods systematic review
Source: PubMed Central journal article supplement — BMJ Glob Health. 2019 Jun 16;4(3):e001308. doi: 10.1136/bmjgh-2018-001308 (PMC6577316; doi:10.1136/bmjgh-2018-001308), 2019-06-16
Supplement: bmjgh-2018-001308supp004.pdf [file bmjgh-2018-001308supp004.pdf]

**Supplementary Table 4: Study characteristics, quality appraisal and overview of equity findings**

| Authors                           | Title                                                                                                                                                                                                  | Year | Intervention type                                 | Region     | Country    | Study Type         | Quality appraisal | Coverage | MNH behaviour | Neonatal mortality |
|-----------------------------------|--------------------------------------------------------------------------------------------------------------------------------------------------------------------------------------------------------|------|---------------------------------------------------|------------|------------|--------------------|-------------------|----------|---------------|--------------------|
| <b>Quantitative studies</b>       |                                                                                                                                                                                                        |      |                                                   |            |            |                    |                   |          |               |                    |
| <i>Home visit interventions</i>   |                                                                                                                                                                                                        |      |                                                   |            |            |                    |                   |          |               |                    |
| Baqui, A. H., et al. [32]         | NGO facilitation of a government community-based maternal and neonatal health programme in rural India: improvements in equity                                                                         | 2008 | Home visits and distribution of medicines by CHWs | South Asia | India      | Quasi-experimental | Moderate          |          |               |                    |
| Callaghan-Koru, J.A., et al. [33] | Contribution of community-based newborn health promotion to reducing inequities in healthy newborn care practices and knowledge: evidence of improvement from a three-district pilot program in Malawi | 2013 | Home visits and distribution of medicines by CHWs | Africa     | Malawi     | Pre-post           | Low               |          |               |                    |
| Kosec, K., et al. [34]            | Predictors of essential health and nutrition service delivery in Bihar, India: Results from household and frontline worker surveys                                                                     | 2015 | Home visits and distribution of medicines by CHWs | South Asia | India      | Cross-sectional    | Low               |          |               |                    |
| Quayyum, Z., et al. [41]          | Can community level interventions have an impact on equity and utilization of maternal health care - evidence from rural Bangladesh                                                                    | 2013 | Home visits and distribution of medicines by CHWs | South Asia | Bangladesh | Pre-post           | Moderate          |          |               |                    |
| Rajbhandari, S., et al. [37]      | Expanding uterotonic protection following childbirth through community-based distribution of misoprostol: operations research study in Nepal                                                           | 2010 | Home visits and distribution of medicines by CHWs | South Asia | Nepal      | Pre-post           | Moderate          |          |               |                    |

|                                                        |                                                                                                                                                                           |      |                                                   |            |                                  |                 |          |  |  |  |
|--------------------------------------------------------|---------------------------------------------------------------------------------------------------------------------------------------------------------------------------|------|---------------------------------------------------|------------|----------------------------------|-----------------|----------|--|--|--|
| Seth, A., et al. [38]                                  | Differential effects of community health worker visits across social and economic groups in Uttar Pradesh, India: a link between social inequities and health disparities | 2017 | Home visits and distribution of medicines by CHWs | South Asia | India                            | Cross-sectional | Moderate |  |  |  |
| Singh, M. K., et al. [35]                              | Factors influencing utilization of ASHA services under NRHM in relation to maternal health in rural Lucknow                                                               | 2010 | Home visits and distribution of medicines by CHWs | South Asia | India                            | Cross-sectional | Low      |  |  |  |
| <i>Cash transfer interventions facilitated by CHWs</i> |                                                                                                                                                                           |      |                                                   |            |                                  |                 |          |  |  |  |
| Nguyen, H. T. H., et al. [39]                          | Encouraging maternal health service utilization: an evaluation of the Bangladesh voucher program                                                                          | 2012 | Cash transfer interventions facilitated by CHWs   | South Asia | Bangladesh                       | Cross-sectional | Moderate |  |  |  |
| Powell-Jackson, T., et al. [36]                        | The impact of Nepal's national incentive programme to promote safe delivery in the district of Makwanpur                                                                  | 2009 | Cash transfer interventions facilitated by CHWs   | South Asia | Nepal                            | Cross-sectional | Moderate |  |  |  |
| <i>Community group interventions</i>                   |                                                                                                                                                                           |      |                                                   |            |                                  |                 |          |  |  |  |
| Houweling, T. A. J., et al. [28]                       | The equity impact of participatory women's groups to reduce neonatal mortality in India: secondary analysis of a cluster-randomised trial                                 | 2013 | Community-based groups                            | Multiple   | India, Nepal, Bangladesh, Malawi | C-RCT           | High     |  |  |  |
| Houweling, T. A.J., et al. [26]                        | Reaching the poor with health interventions: programme-incidence analysis of seven randomised trials of women's groups to reduce newborn mortality in Asia and Africa     | 2016 | Community-based groups                            | Multiple   | India, Nepal, Bangladesh, Malawi | C-RCT           | High     |  |  |  |

|                                  |                                                                                                                                                               |      |                                                   |                 |            |                 |          |  |  |  |  |  |  |
|----------------------------------|---------------------------------------------------------------------------------------------------------------------------------------------------------------|------|---------------------------------------------------|-----------------|------------|-----------------|----------|--|--|--|--|--|--|
| Houweling, T. A. J., et al. [27] | The equity impact of community women's groups to reduce neonatal mortality: a meta-analysis of four cluster randomized trials                                 | 2017 | Community-based groups                            | South Asia      | India      | C-RCT           | High     |  |  |  |  |  |  |
| Målqvist, M., et al. [31]        | Effect of facilitation of local stakeholder groups on equity in neonatal survival; results from the NeoKIP trial in northern Vietnam                          | 2016 | Community-based groups                            | South East Asia | Vietnam    | C-RCT           | High     |  |  |  |  |  |  |
| <i>Mixed interventions</i>       |                                                                                                                                                               |      |                                                   |                 |            |                 |          |  |  |  |  |  |  |
| Huq, N. L., et al. [40]          | Effect of an integrated maternal health intervention on skilled provider's care for maternal health in remote rural areas of Bangladesh: a pre and post study | 2015 | Mixed interventions                               | South Asia      | Bangladesh | Pre-post        | Moderate |  |  |  |  |  |  |
| Sousa, A., et al. [42]           | Reducing inequities in neonatal mortality through adequate supply of health workers: evidence from newborn health in Brazil                                   | 2013 | Mixed interventions                               | Latin America   | Brazil     | Cross-sectional | Low      |  |  |  |  |  |  |
| <b>Qualitative studies</b>       |                                                                                                                                                               |      |                                                   |                 |            |                 |          |  |  |  |  |  |  |
| <i>Home visit interventions</i>  |                                                                                                                                                               |      |                                                   |                 |            |                 |          |  |  |  |  |  |  |
| Gupta, M., et al. [44]           | Impact of a multi-strategy community intervention to reduce maternal and child health inequalities in India: a qualitative study in Haryana                   | 2017 | Home visits and distribution of medicines by CHWs | South Asia      | India      | Qualitative     | Moderate |  |  |  |  |  |  |
| Mumtaz, Z., et al. [45]          | The role of social geography on Lady Health Workers' mobility and effectiveness in Pakistan                                                                   | 2013 | Home visits and distribution of medicines by CHWs | South Asia      | Pakistan   | Mixed-methods   | High     |  |  |  |  |  |  |

| <i>Community group interventions</i> |                                                                                                                                                              |      |                        |                 |          |               |          |             |             |            |
|--------------------------------------|--------------------------------------------------------------------------------------------------------------------------------------------------------------|------|------------------------|-----------------|----------|---------------|----------|-------------|-------------|------------|
| Duong, D. M., et al. [30]            | Exploring the influence of context in a community-based facilitation intervention focusing on neonatal health and survival in Vietnam: A qualitative study   | 2015 | Community-based groups | South East Asia | Vietnam  | Qualitative   | Moderate | Light Green | Orange      |            |
| Morrison, J., et al. [29]            | Understanding how women's groups improve maternal and newborn health in Makwanpur, Nepal: a qualitative study                                                | 2010 | Community-based groups | South Asia      | Nepal    | Qualitative   | Moderate | Light Green |             |            |
| Rath, S., et al. [25]                | Explaining the impact of a women's group led community mobilisation intervention on maternal and newborn health outcomes: the Ekjut trial process evaluation | 2010 | Community-based groups | South Asia      | India    | Mixed-methods | High     | Light Green | Light Green | Dark Green |
| <i>Mixed interventions</i>           |                                                                                                                                                              |      |                        |                 |          |               |          |             |             |            |
| Mannah, M. T., et al. [43]           | Opportunities and challenges in implementing community based skilled birth attendance strategy in Kenya                                                      | 2014 | Mixed interventions    | Africa          | Kenya    | Qualitative   | Moderate |             | Red         |            |
| Mumtaz, Z., et al. [46]              | Good on paper: the gap between programme theory and real-world context in Pakistan's community midwife programme                                             | 2015 | Mixed interventions    | South Asia      | Pakistan | Qualitative   | High     | Red         |             |            |

N.B.: Colour coding in the table shows when and how studies reported levels of equity for coverage, behaviours and mortality outcomes, as follows: (1) dark green for pro-equitable (effects for coverage or outcomes were greater for those with lower socio-economic position than for those with higher); (2) light green for equitable effects (no difference in effects for coverage or outcomes between socio-economic groups); (3) orange for a mix of inequitable and equitable or pro-equitable (effects for coverage or outcomes were greater for lower compared to higher socio-economic groups in some but not other socio-economic position dimensions or outcomes); and (4) red for inequitable effects (all effects for coverage or outcomes were greater for those with higher socio-economic position than for those with lower).
